# Supplementary material
Source: ML conference proceedings conference paper supplement (https://openreview.net/forum?id=LO_2RjhOZZ-)
Supplement: supplementary_material [file attachment]

---

# Causal Discovery with Hidden Confounders using the Algorithmic Markov Condition

---

David Kaltenpoth<sup>1</sup>

Jilles Vreeken<sup>1</sup>

<sup>1</sup>CISPA Helmholtz Center for Information Security, Saarbrücken

## Abstract

Causal sufficiency is a cornerstone assumption in causal discovery. It is, however, both unlikely to hold in practice as well as unverifiable. When it does not hold, existing methods struggle to return meaningful results. In this paper, we show how to discover the causal network over both observed *and* unobserved variables. Moreover, we show that the causal model is identifiable in the sparse linear Gaussian case. More generally, we extend the algorithmic Markov condition to include latent confounders. We propose a consistent score based on the Minimum Description Length principle to discover the full causal network, including latent confounders. Based on this score, we develop an effective algorithm that finds those sets of nodes for which the addition of a confounding factor  $Z$  is most beneficial, then fits a new causal network over both observed as well as inferred latent variables.

## 1 INTRODUCTION

Discovering causal relationships from observational data is one of the most important open problems in science [Pearl, 2009]. Causal discovery methods aim to identify causal networks from data by reporting only edges that cannot be explained away by any other variables. Most typical causal discovery methods have in common that unless *all* relevant variables have been measured, they return models that include (many) spurious edges and thus lack a causal interpretation. The most commonly used approach is to wish the problem away by assuming *causal sufficiency*, i.e., that all common causes of all observed variables are observed. However, doing this does not make the issue disappear in practice; in many applications, including epidemiology [Kesteloot et al., 2006], economics [Angrist and Pischke, 2009], and bio-medicine Imbens and Rubin [2015], we do not know

all the relevant variables, nor would we be able to measure them even if we knew.

In this paper, we present an approach to causal discovery that does not require causal sufficiency over the observed variables. We give conditions under which it is possible to identify joint confounders, and show how to infer these using factor analysis, as well as how to construct a causal network without spurious edges over both the observed  $X$  and the discovered confounders  $Z$ .

This may seem impossible. After all, given only a sample from  $P(X)$ , there exist infinitely many joint distributions  $P(X, Z)$  consistent with the marginal  $P(X)$ , and picking out the  $P(X, Z)$  that corresponds to the true causal mechanism sounds far-fetched. It is not. First, we can exploit the fact that a causal graph discovered over the observed variables  $X$  will contain many spurious edges  $X_i \rightarrow X_j$  when both are affected by the hidden latent variable  $Z$  [Elidan et al., 2000]. That is, by focusing on those subsets of  $X$  that are densely connected in the graph, we can determine which variables are likely to share a hidden confounder.

While not every densely connected set of variables necessarily shares a hidden confounder, we can use the *algorithmic Markov condition* (AMC) to find the simplest causal model describing the data [Janzing and Schölkopf, 2010]. In particular, such a model may include latent variables  $Z$  affecting the observed  $X$  so as to respect the *independence of causal mechanisms* [Parascandolo et al., 2018].

Putting these two ideas together, we have the following natural approach: run a causal discovery algorithm on the observed data, find sets of densely connected variables in the learned graph, learn a latent factor model for each set, and then use the AMC to determine which so-found  $P(X, Z)$  are simpler than  $P(X)$ . If so, add the best newly discovered confounder  $Z$  to  $X$  and iterate until convergence.

We show that our approach is both theoretically and empirically sound. It provably recovers the true set of confounded nodes under general conditions, while for the sparse linear

Gaussian setting, it is consistent for recovering the entire model. Empirical evaluation shows it to be highly accurate. It improves both over methods that do assume causal sufficiency as well as those which do not. All code, data, results, and proofs can be found online on the authors’ website!<sup>1</sup>

## 2 THEORY

We first describe our problem setting. We then prove identifiability for sparse linear Gaussian (SLG) models and provide a framework for causal discovery under latent confounding. With this, we derive a consistent score for the SLG.

### 2.1 PROBLEM SETTING

Let  $X = (X_1, \dots, X_m)$  and  $Z = (Z_1, \dots, Z_l)$  be two sets of variables with joint distribution  $P(X, Z)$ , where  $X$  are observed and  $Z$  unobserved variables. Our goal is to discover a network over  $X, Z$ , that is, a directed acyclic graph (DAG)  $G_{X,Z} = (V, E)$  with vertices  $X \cup Z$  and edges capturing the causal relationships in  $P(X, Z)$ . By marginalizing over  $Z$ , we obtain a distribution  $P(X)$  with a corresponding network  $G_X$ . When the variables are clear from the context, we write  $G$  for  $G_{X,Z}$ , respectively  $G_X$ .

To permit identifiability of the network  $G_{X,Z}$ , we have to make some common assumptions [Koller and Friedman, 2009]. First, *Causal Faithfulness*: if  $U$  and  $V$  are independent given  $W$  in  $P(X, Z)$ , then  $U$  and  $V$  are  $d$ -separated by  $W$  in  $G$ . Second, the *Causal Markov Condition*: each  $Y \in X \cup Z$  is independent of its non-descendants given its parents  $\text{Pa}_G(Y)$ . Third, we do not assume *Causal Sufficiency* over  $X$ , but we *do* assume it over  $X \cup Z$ . That is, we assume that all common parents of at least two variables  $U, V \in (X, Z)$  are included in  $X \cup Z$ . In other words, all non-causal correlations can be *explained away* by conditioning on the right variables. Last, we assume that all  $Z_j$  are jointly independent and that no reverse causation exists, i.e.,  $\text{Pa}(Z_j) = \emptyset$ . Under these assumptions, we have

$$P(X, Z) = \prod_{i=1}^m P(X_i | \text{Pa}_i) \prod_{j=1}^l P(Z_j),$$

where  $\text{Pa}_i = \text{Pa}_G(X_i)$ . Such factorizations are a cornerstone of causal learning [Pearl, 2009], allowing for the identification of many causal effects. Our goal is the following.

**Problem Statement.** *Given a sample  $x^n$  only from the observed distribution  $P(X)$ , discover*

- a (small) set of latent variables  $Z$
- a (sparse) network  $G$  over  $X$  and  $Z$

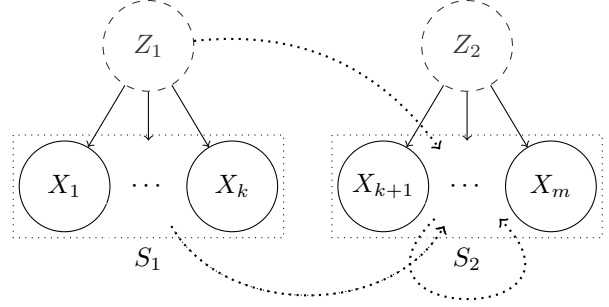

Figure 1: Structural assumptions 1 and 2 of our model. Each  $Z_i$  has an edge towards all nodes in  $S_i$  (solid), but only few other edges (dotted) are incoming to each  $S_i$ .

- and a (simple) joint distribution  $P(X, Z)$  such that

$$P(X, Z) = \prod_{i=1}^m P(X_i | \text{Pa}_i) \prod_{j=1}^l P(Z_j),$$

factorizes according to the discovered  $G$ .

In the following, we note a simple property laying the foundations for discovering all three of these components.

### 2.2 STRUCTURE OF LATENT CONFOUNDING

To solve our problem, we start with the following observation. Whenever a set of variables  $X_S = (X_i)_{i \in S}$ ,  $S \subseteq \{1, \dots, m\}$ , are co-caused by an unmeasured  $Z$ , no pair  $X_i, X_j \in X_S$  can be made independent by conditioning on any other subset  $W \subset X$ . Thus, when  $G$  captures the independences of  $P$ , all pairs in  $X_S$  are connected. That is,  $G$  contains a *clique* over  $X_S$  [Elidan et al., 2000].

**Proposition 1** (Confounders and Cliques). *Let  $P(X, Z)$  be the joint distribution of  $X, Z$  where  $Z$  is one-dimensional and let  $S = \{i : Z \rightarrow X_i\}$ . Then any graph  $G_X$  capturing the correlations in  $P(X)$  contains a clique over  $X_S$ .*

When  $Z$  is multivariate, each  $Z_j$  induces its own clique in  $G$ , all of which may overlap. Next, we show that this graphical characterization of confounding is already sufficient to identify the true model in the sparse linear Gaussian case.

### 2.3 IDENTIFIABILITY FOR THE SPARSE LINEAR GAUSSIAN MODEL

To prove identifiability of the causal model, we assume that  $P(X, Z)$  is given by a linear Gaussian structural causal model (SCM, Pearl [2009])

$$X = A^\top X + B^\top Z + \epsilon \quad (1)$$

<sup>1</sup><https://eda.rg.cispa.io/prj/pepsi/>

where  $A$  encodes the DAG  $G$ ,  $Z \sim N(0, I)$  and  $\epsilon \sim N(0, \text{diag}(\sigma_\epsilon^2))$ . We further make the following assumptions on the causal model generating our data  $X, Z$ .

**Assumption 1.** *There exists a partition of the variables  $X$  into  $l$  disjoint sets  $S_1, \dots, S_l$  of sizes  $|S_j| \geq 4$  such that for each variable  $X_i \in S_j$  the direct causal effect  $b_{ij}$  of  $Z_j \rightarrow X_i$  is non-zero,  $b_{ij} \neq 0$ .*

This assumption guarantees that each  $Z_j$  has an influence on a subset  $S_j$  of the variables  $X$  that is sufficiently large to recover its parameters  $b_{ij}$ . Of course, this would not avail us much if the overlaps between sets are too large, e.g., when two variables  $Z_j \neq Z_k$  have exactly the same sets  $S_j = S_k$  of downstream effects. To prevent such cases, we introduce our next assumption.

**Assumption 2.** *There are at most  $|S_j| - 4$  edges incoming to vertices in  $S_j$ , aside from the edges  $Z_j \rightarrow S_j$ .*

This assumption ensures that the different  $Z_j, Z_k$  cannot have too much overlap in their  $S_j$ , either through direct connections of  $Z_j \rightarrow S_k$ , or through indirect paths  $Z_j \rightarrow S_j \rightarrow S_k$ . That is, the sets  $S_j$  are only weakly connected to each other to ensure distinguishability between the effects of different  $Z_j$ . Note in particular that since models with  $Z_j \rightarrow Z_k$  are indistinguishable from models where each node in  $X_i \in S_k$  also has an edge  $Z_j \rightarrow X_i$ , this assumption requires  $Z$  to be jointly independent. Likewise, as we saw in the first example, there also cannot be too many connections between variables *within*  $S_j$ , as this makes it impossible to tell which correlations are due to  $Z_j$ , and which due to causal effects of variables within  $S_j$ .

When all assumptions hold, the causal model is identifiable.

**Theorem 2.** *Let our distribution  $P(X, Z)$  be described by the linear Gaussian SEM given in Eq. (1)*

$$X = A^\top X + B^\top Z + \epsilon,$$

for some  $Z$  of dimension  $l \leq m/4$ . Further, let assumptions 1-3 hold. Then the number  $l$  of confounders and its parameters  $B$  are identifiable up to column permutations and rescaling. Furthermore, if all noise variables  $\epsilon$  have equal variances, then  $A$  is also identifiable.

Unlike this sparse linear Gaussian (SLG) case, causal models with latent variables are generally overparametrized and thus unidentifiable. As we show next, however, it is possible to identify *whether or not* latent confounders are involved.

## 2.4 ALGORITHMIC MODEL OF CAUSALITY

To determine whether variables  $X$  are influenced by latent confounders, we introduce the algorithmic model of causality. We begin by studying  $P(X)$  under the assumption

that no latent variables  $Z$  are involved. In the algorithmic model of causality, the distribution  $P(X)$  with graph  $G$  corresponds to a set of programs  $f_i$  describing how each  $X_i$  is generated from  $\text{Pa}_i$  and mutually independent noise  $\epsilon$

$$X_i = f_i(\text{Pa}_i, \epsilon_i), \quad \epsilon_i \perp \text{Pa}_i.$$

We can measure the complexity of such a description of  $P(X)$  using Kolmogorov complexity [Li and Vitányi, 2009]. Given a universal Turing machine  $U$ , it measures the length of the shortest program  $p$  approximating a given function  $f$ ,

$$K(f) := \min_p \{ |p| \mid \forall u \forall q : |U(u, p, q) - f(u)| \leq 1/q \}.$$

Kolmogorov complexity optimally utilizes all available information and therefore measures the length of the best compression of  $f$ . If  $P(X)$  is the distribution generated by a causal process, the *true* causal model should also compress  $P(X)$  *best*. This notion is captured by the algorithmic Markov condition (AMC) [Janzing and Schölkopf, 2010].

**Postulate** (Algorithmic Markov Condition). *Let  $G^*$  be the true causal network for  $P(X)$ . Then*

$$K(P(X)) \stackrel{\pm}{=} \sum_{i=1}^m K(P(X_i | \text{Pa}_{G^*}(X_i))),$$

where  $\stackrel{\pm}{=}$  denotes equality up to an additive constant that depends on the Turing machine  $U$  but is independent of  $P$ .

In the bivariate case, if  $X$  causes  $Y$ , it says

$$K(P(X)) + K(P(Y | X)) \stackrel{\pm}{\leq} K(P(Y)) + K(P(X | Y)).$$

The AMC states that the true network  $G^*$  not only provides the best factorization of  $P$  but the best compression of  $P$  in general. In particular,  $P(X_i | \text{Pa}_i)$  and  $P(X_j | \text{Pa}_j)$  cannot be better compressed jointly so that they do not share any structure. In other words, the causal mechanisms generating  $X_i$  and  $X_j$  are *algorithmically independent* of each other [Janzing and Schölkopf, 2010].

This independence breaks under latent confounding. Consider the case where  $(X_1, \dots, X_4)$  are given by  $X = B^\top Z + \epsilon$  with unobserved univariate  $Z \sim N(0, 1)$ . Then  $P(X)$  is fully described by its covariances  $\sigma_{ij} = b_i b_j$ . However, for 4 variables, there are 6 covariances described by the four parameters  $b_1, \dots, b_4$ , rendering them dependent.

Finding models with independent causal mechanisms, therefore, requires us to consider models with latent factors, i.e., distributions  $P(X, Z)$  with marginals  $P(X)$  and  $P(Z) = \prod_j P(Z_j)$ , the class of which we refer to as  $\mathcal{P}$ . The question is whether it is meaningful to compare  $P(X, Z)$  with  $P(X)$  in terms of Kolmogorov complexity. The following theorem provides a positive answer to this question.

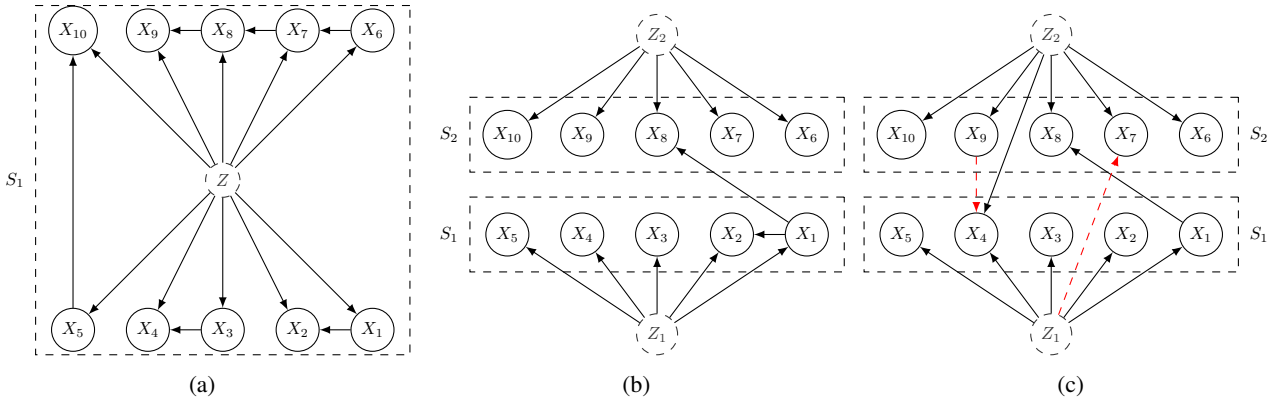

Figure 2: Example graphs illustrating our structural assumptions. (a) All observed variables are confounded by the same factor  $Z_1$ , and 6 edges exist between its children  $S_1$ . (b) Two different confounders affecting five nodes each, and one additional edge incoming to each of the sets. (c)  $Z_2$  affects one of the nodes in  $S_1$ . Furthermore, if we added either of the dashed red edges, too many edges incoming into  $S_1$ , respectively,  $S_2$  would render the model unidentifiable.

**Theorem 3** (Kolmogorov Does Not Incorrectly Detect Confounders). *For any distribution  $P(X)$ , we have*

$$\inf_{P(X,Z) \in \mathcal{P}} K(P(X,Z)) \stackrel{+}{\leq} K(P(X)),$$

where the infimum is over all joint distributions  $P(X,Z)$  with fixed marginal  $P(X)$  and independent  $Z$ . Conversely, if a joint distribution  $P(X,Z) \in \mathcal{P}$  exists such that

$$K(P(X,Z)) < K(P(X)), \quad (2)$$

then the true generating mechanism of  $X$  includes latent variables influencing some subset  $X_S$ .

First, this result shows that there is no intrinsic bias towards one type of distribution being more complex than the other. Second a confounded model can only offer the best description of the data if the true generating mechanism involves unobserved variables. In this case, we can write

$$K(P(X,Z)) = \sum_{i=1}^m K(P(X_i | \text{Pa}(X_i))) + \sum_{j=1}^l K(P(Z_j))$$

where the parents of  $X_i$  are among both  $X$  and  $Z$ . Note that while we cannot incorrectly infer latent confounders where there are none, we may miss latent variables that do exist.

## 2.5 INSTANTIATING THE AMC

Using Kolmogorov complexity, we have developed a framework for discovering latent confounders affecting  $P(X)$ . To use it in practice, however, we need to address two challenges: access only to a sample  $x$  and incomputability of Kolmogorov complexity [Li and Vitányi, 2009].

The first issue is resolved in the large sample limit, where measuring the suitability of a causal model using  $K(x)$

instead of  $K(P(X))$  leads to the same decisions [Marx and Vreeken, 2021]. To solve the second issue, we use the Minimum Description Length (MDL) principle [Grünwald, 2007]. In its simplest form, to encode data  $x$ , we choose a model  $M$  and encode both  $M$  and  $x$  given  $M$  as

$$L(x, M) = L(x | M) + L(M).$$

We then want to find the best model  $M^*$  in some model class  $\mathcal{M}$ . For any  $\mathcal{M}$ , we have  $K(x) \leq \inf_{M \in \mathcal{M}} L(x, M)$ , so that MDL provides a well-founded upper bound on  $K$ .

In this work, our focus is not on identifying a single best model but on determining whether a subset  $X_S$  of the observed variables is confounded or not. To distinguish between model classes, we use refined MDL Grünwald [2007]

$$L(x, \mathcal{M}) := -\log \int_{M \in \mathcal{M}} P(x|M)Q(M)dM, \quad (3)$$

where  $Q$  is a prior on the models  $M \in \mathcal{M}$ .

For this score to be sound, we next establish a result similar to Eq (2). More precisely, we show that confounded models obtain a better score only if causal sufficiency is violated. To do this formally, we require two things. First, a class  $\mathcal{M}_0$  of models without latent factors. Second, a set  $\mathfrak{M}$  of model classes  $\mathcal{M}$  describing the observed distribution  $P(X)$  as marginal of a joint distribution  $P(X,Z)$  in some distinct way. For data  $x$  sampled from  $P(X)$ , Eq. (2) then corresponds to asking whether or not

$$\inf_{\mathcal{M} \in \mathfrak{M}} L(x, \mathcal{M}) < L(x, \mathcal{M}_0). \quad (4)$$

The following theorem tells us that, indeed, Eq. (4) holds only if latent variables were involved in generating  $x$ .

**Theorem 4** (MDL Does Not Incorrectly Detect Confounders). *Let  $x^n$  be the observed part of an i.i.d. sample*

from  $P \in \mathfrak{M} \cup \{\mathcal{M}_0\}$ . Further, assume that Eq. (4) holds  $P$ -almost surely as  $n \rightarrow \infty$ . Then  $P \in \mathfrak{M}$ .

Just as in the case of algorithmic causality, i.e., Thm. 3, it is generally impossible to guarantee recovery of the exact true model. However, for the SLG, it is possible to define a consistent score, requiring no further assumptions than those we already made for identifiability. in Sec. 2.3.

**Theorem 5** (Consistency of BIC for SLGs). *Let  $x = x^n$  be a sample from the SLG of Eq. (1) and let assumptions (A1)-(A3) hold. Let  $\mathcal{M}$  be the corresponding model class and  $\mathcal{M}_0$  the restriction of  $\mathcal{M}$  to models with  $B = 0$ . Let*

$$L(x^n, M) = -\log P(x^n | A, B, \sigma_\epsilon^2) + \lambda \|A\|_0 + \lambda \|B\|_0 \quad (5)$$

and  $\hat{A}, \hat{B}$  its minimizers. Then for  $\lambda = \log(n)/2$ , the score  $L$  is consistent for detecting confounders. That is,

$$\lim_{n \rightarrow \infty} P\left(\min_{M \in \mathcal{M}} L(x^n, M) < \min_{M \in \mathcal{M}_0} L(x^n, M)\right) = 1.$$

Further,  $\hat{A}$  and  $\hat{B}$  converge to the true  $A, B$  in probability,

$$\lim_{n \rightarrow \infty} P(\hat{A} = A, \hat{B} = B) = 1.$$

While it is remarkable that in the linear Gaussian case, the full causal model can be recovered from a sample  $x$  from  $P(X)$  only, we have to solve two problems before we can put this into practice. First, we do not know  $B$ , nor even which of the exponentially many subsets  $X_S \subseteq X$  are affected by any one  $Z_j$ . Second, even knowing  $B$  and  $Z$ , optimizing Eq. (5) is NP-hard [Peters and Bühlmann, 2012]. We, therefore, next develop a good heuristic as to which subsets  $X_S$  are likely affected by  $Z$  and show how standard causal discovery algorithms can be leveraged to find a causal network over both the observed  $X$  and the latent  $Z$ .

### 3 THE CDHC ALGORITHM

With the theory we developed, we can now introduce CDHC, our method for Causal Discovery with Hidden Confounders.

#### 3.1 FINDING CONFOUNDED VARIABLES

To find a causal network over both  $X$  and its confounders  $Z$ , we first need to determine which subsets of  $X$  are likely to be confounded. A structure learning algorithm  $\mathcal{A}$  can help us determine these sets by discovering connected subsets of variables (Prop. 1). If  $X_S$  are densely connected in the discovered graph  $G$ , then the Markov boundaries satisfy  $X_i \in X_S$  is  $\text{MB}(X_i) \approx X_S$ . Therefore, we consider the Markov boundary of each node as the seed sets  $S$  over which we may infer latent confounders.

#### 3.2 LEARNING LATENT CONFOUNDERS

To evaluate a proposed set of confounded nodes and its associated graph  $G$ , we introduce a causal model including latent factors as follows. Based on Theorem 2, given a graph  $G$  over  $(X, Z)$ , we assume that the data is generated from a model in a class  $\mathcal{M} = \mathcal{M}(G)$  similar to Probabilistic PCA (PPCA) [Tipping and Bishop, 1999]

$$\begin{aligned} Z_i &\sim N(0, 1), & \epsilon &\sim N(0, \sigma_\epsilon^2) \\ A_{ij} &\sim N(0, \sigma_a^2), & B_{ij} &\sim N(0, \sigma_b^2) \end{aligned} \quad (6)$$

$$X = A^\top Z + B^\top Z + \epsilon,$$

where entries of  $A, B$  are nonzero only when their corresponding edges are in  $G$ . By marginalizing out  $Z$ , we obtain

$$X | A, B \sim N(0, C(B^\top B + \sigma_\epsilon^2)C^\top),$$

where  $C = (I - A^\top)^{-1}$ . Since the  $A_{ij}$  are sampled from a continuous distribution, assumption (A3) holds almost surely so that, unlike PPCA, we do not require  $A = 0$ .

To evaluate the fit of our model class  $\mathcal{M}$  to our data  $x$ , we use the score  $L(x, \mathcal{M})$  defined in Eq. (3)

$$L(x, \mathcal{M}) = -\log \int P(x | A, B)P(A, B)dAdB,$$

which we can estimate using standard variational methods [Kucukelbir et al., 2017]. This score is suitable in that it is consistent for causal discovery with latent confounders.

**Theorem 6** (Consistency of MDL for SLGs). *Let the assumptions of Thm. 5 hold. Then the minimizer  $\hat{G}$ ,*

$$\hat{G} = \arg \min_G L(x^n, \mathcal{M}(G)),$$

converges to the ground truth  $G^*$  with probability one,

$$\lim_{n \rightarrow \infty} P(\hat{G} = G^*) = 1.$$

With this guarantee that our score is sound, we now introduce our method for discovering the entire causal network.

#### 3.3 DISCOVERING THE CAUSAL NETWORK

We can now put all of the above together and present CDHC. We give the pseudo-code as Algorithm 1. We first (line 1) discover a graph  $G$  over the observed data  $x$  using a score-based structure discovery algorithm  $\mathcal{A}$ , such as GES [Chickering, 2002], GGSL [Gao et al., 2017] or NOTEARS [Zheng et al., 2018]. We then consider every node  $X_i$  and initialize the confounded set  $X_S$  with the Markov boundary  $\text{MB}(X_i)$  and add a node  $Z$  and edges  $Z \rightarrow X_S$  to  $G$ . (l. 4-5). We refine  $S$  by greedily adding nodes (l. 6-9), then removing nodes (l. 10-13). After finding the locally optimal set  $S$ , we

---

**Algorithm 1:** CDHC

---

**input** : data  $x$  sampled from  $P(X)$ , algorithm  $\mathcal{A}$   
**output** : graph  $G$  and distribution  $P(X, Z)$

```

1  $G = (V, E) \leftarrow$  Graph inferred over  $x$  using  $\mathcal{A}$ ;
2 do
3   foreach  $i \in \{1, \dots, m\}$  do
4      $X_S \leftarrow$  Markov boundary of  $X_i$  in  $G$ ;
5      $G' \leftarrow (V \cup \{Z\}, E \cup \{Z \rightarrow X_S\})$ ;
6     // Forward phase
7     do
8        $j \leftarrow \arg \min_{j \notin S} L(x, G' \cup \{Z \rightarrow X_j\})$ ;
9        $(S, G') \leftarrow (S \cup \{j\}, G' \cup \{Z \rightarrow X_j\})$ ;
10      while  $L(x, G')$  decreases;
11      // Backward phase
12      do
13         $j \leftarrow \arg \min_{j \in S} L(x, G' \setminus \{Z \rightarrow X_j\})$ ;
14         $(S, G') \leftarrow (S \setminus \{j\}, G' \setminus \{Z \rightarrow X_j\})$ ;
15        while  $L(x, G')$  decreases;
16         $z \leftarrow$  sample from  $P(Z | X)$ ;
17         $G[i] \leftarrow$  Graph inferred over  $(x, z)$  using  $\mathcal{A}$ ;
18      // Use the model with best confounder
19       $G \leftarrow \arg \min_{G[i]} L((x, z), G[i])$ ;
20 while  $G$  changes;
21 return  $G$  and the  $P(X, Z)$  associated with  $G$ 
```

---

sample  $z$  from  $P(Z | X)$  and fit a network over  $(x, z)$  using  $\mathcal{A}$  (l. 14-15). Out of all these networks, we update  $G$  to be the best of them (l. 16) and iterate until convergence (l. 17). Finally, we return the discovered network  $G$  and distribution  $P(X, Z)$  over  $X$  and its inferred confounders  $Z$  (l. 18).

Note that since our score strictly decreases at every step, our method necessarily converges. Furthermore, we can show that in the large sample limit we are guaranteed to recover the true set of confounded nodes.

**Proposition 7** (Consistency of CDHC for Discovering Confounded Nodes). *Let  $x^n$  be the an i.i.d. sample from  $P \in \mathcal{M}(G^*)$  defined in Eq. (6), let assumptions (A1-3) hold and let  $S_i^*$  be the set of nodes affected by  $Z_i$ . Assume that  $\bigcap_{s \in S_i^*} MB_{G^*}(X_s) \setminus \{Z_i\} \subsetneq S_i^*$ . Let  $\mathcal{A}$  be a consistent for recovering the Markov equivalence class of the graph  $G_X$  for distribution  $P(X)$ . Let  $\hat{S}_i$  be the set nodes confounded by  $Z_i$  discovered by CDHC. Then*

$$\lim_{n \rightarrow \infty} P(\hat{S}_i = S_i^*) = 1.$$

While we can recover the correct sets of confounded nodes, to recover the entire graph  $G^*$ , we need additional assumptions such as those outlined in Theorem 5.

### 3.4 COMPLEXITY

Last, we analyze the runtime complexity of CDHC. CDHC employs a loop (l. 2-17) whose inside has complexity  $O(C(m, n) + m^2n) = O(C(m, n))$  – the former,  $C(m, n) = \Omega(m^2n)$ , is the runtime for running  $\mathcal{A}$  and the latter  $m^2n$  for finding  $S$ . Since we can find at most  $O(m)$  non-overlapping confounded sets, our worst case runtime is therefore on the order of  $O(mC(m, n))$ . In general, only few variables are confounded so that in practice, our runtime is roughly  $O(C(m, n))$  — the same as that of  $\mathcal{A}$  itself.

### 4 RELATED WORK

Causal inference is one of the most important problems in statistical inference and has attracted a lot of research attention [Pearl, 2009, Spirtes et al., 2000]. Unfortunately, latent confounding makes it impossible to infer causality from observational data without making additional assumptions [Pearl, 2009]. Traditional constraint-based [Spirtes et al., 2000, Zhang, 2008] and score-based [Chickering, 2002, Gao et al., 2017, Zheng et al., 2018] causal discovery methods can reconstruct the true causal network up to Markov equivalence when causal sufficiency holds.

When causal sufficiency does not hold, a number of algorithms such as the FCI family [Spirtes et al., 2000, Colombo et al., 2012, Ogarrio et al., 2016], 3OFF2 [Affeldt et al., 2016] and DCD [Bhattacharya et al., 2021] can find complete partially directed acyclic graphs which can capture correlations due to confounders. However, these networks are generally difficult to interpret and cannot determine which sets of variables share the same latent confounder.

To make the resulting causal networks more interpretable, observational and experimental data can be combined to improve results [Kallus et al., 2018, Kocaoglu et al., 2019]. However, these methods are generally restricted in their ability to rule out or corroborate the existence of latent variables by the scarcity of available experimental data.

Other research controls causal estimates for latent confounders. To do so, Hoyer et al. [2008] solve the overcomplete ICA problem to correct the estimated causal effect of  $X$  on  $Y$  for confounders, whereas Wang and Blei [2018] and Ranganath and Perotte [2018] use factor models.

Until recent years, only little prior research has tackled the topic of determining which variables share the same latent confounders. Janzing and Schölkopf [2018] considered the case of determining whether the variables  $X$  are confounded by finding deviations of the regression vector from theoretical properties in high-dimensional regression. Kaltenpoth and Vreeken [2019] use the AMC [Janzing and Schölkopf, 2010] to infer whether two sets of variables  $X$  and  $Y$  are causally related or jointly confounded. Silva et al. [2006] proposed a model based on low-rank correlation structures

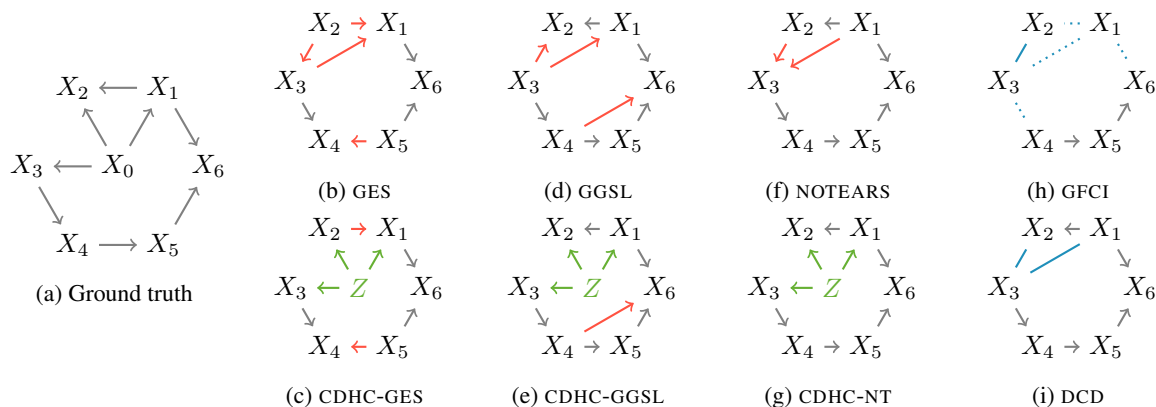

Figure 3: Application of CDHC to synthetic data generated from the network shown in (a). When  $X_0$  is withheld, all base algorithms  $\mathcal{A}$  (b,d,f) find a clique of spurious edges on  $X_1, X_2, X_3$  (red). GFCI (h) and DCD (i) indicate that some pairs from  $X_1, X_2$  and  $X_3$  are confounded (blue) but cannot tell that they share the same confounder. In contrast, by applying CDHC (c, e, g), we discover a confounder capturing the effect of  $X_0$  (green) and obtain higher quality networks in all cases.

between observed variables. Elidan et al. [2000] proposed an algorithm for replacing semi-cliques in a discovered causal graph with single nodes based on the idea that such cliques are likely due to latent confounding.

More recently, work based on trek-separation [Kummerfeld and Ramsey, 2016], rank-constraints [Huang et al., 2022], heterogeneous data sources [Zhou et al., 2022], and over-complete ICA-based approaches [Xie et al., 2020, Adams et al., 2021] have been used to obtain the (hierarchical) latent structure of the observed variables. They do not, however, permit edges between the observed variables. This is in line with the recent field of causal representation learning [Schölkopf et al., 2021], where it is assumed that *all* observed correlations are due to causal relations between the unobserved variables. While such assumptions are realistic for data such as images (pixels don’t cause each other), they are not reasonable for data gathered from physical, biological, or social systems.

## 5 EXPERIMENTS

In this section, we evaluate CDHC empirically. We are interested in two things; first, how well it recovers the set of confounded nodes  $S^*$ , and second, how well it recovers the entire network. We compare CDHC against NOTEARS [Zheng et al., 2018], 3OFF2 [Affeldt et al., 2016], DCD [Bhattacharya et al., 2021] and GFCI [Ogarrio et al., 2016].<sup>2</sup> We instantiate CDHC with different causal discovery algorithms  $\mathcal{A}$  and refer to CDHC using  $\mathcal{A}$  as CDHC- $\mathcal{A}$ . Specifically, we use GES [Chickering, 2002], GGSL [Gao et al., 2017], and NOTEARS [Zheng et al., 2018]. When clear from the context, we write CDHC for CDHC-GES. We implement CDHC

<sup>2</sup>GFCI is part of a group of methods, including FCI and RFICI. Preliminary experiments corroborated previous research [Ogarrio et al., 2016] that GFCI performs better than its relatives.

in Python. For comparison with all other methods, we use the implementations provided by the respective authors. All experiments finished within minutes on a commodity laptop. All code and data can be found online, along with additional experiments postponed in the interest of space.<sup>3</sup>

### 5.1 SYNTHETIC DATA

We evaluate CDHC on synthetic data by generating a random acyclic graph  $G$  of size  $m$  from the Erdős-Rényi model with parameter  $p = 0.3$ . We model the causal relationships via a linear SEM,  $X = AX + \alpha BZ + \epsilon$  where  $A_{ij} \neq 0$  if and only if  $(i, j) \in E(G)$ . Nonzero values of  $A, B, Z, \epsilon$  are all  $\sim N(0, 3)$ . The parameter  $\alpha \sim U[1, 8]$  determines the relative strength of confounding. Using this model, we generate 1000 data sets over  $m = 50$  variables, of which ten nodes are confounded. Before moving to the general case, we begin by studying how CDHC improves over base algorithms  $\mathcal{A}$  on an illustrative example with  $\dim(Z) = 1$ .

*Comparison with Base Algorithms* We begin by showing that CDHC produces better results than standard discovery algorithms when not all variables are observed. We consider the network shown in Fig. 3a containing nodes  $X_0, \dots, X_6$ , of which  $X_1, X_2, X_3$  are confounded by  $X_0$ . When withholding  $X_0$ , none of the base methods find the correct structure over  $X_1, X_2, X_3$ . Furthermore, while GFCI and DCD find the variables to be confounded, they cannot tell that all variables share the same confounder. In contrast, by applying CDHC, we consistently find that  $X_1, X_2, X_3$  are confounded while maintaining the quality of the remaining edges.

*Confidence and Performance* Since we generally do not have access to the ground truth network in practice, we next test how well we can predict the performance of each method from an easily observable quantity. That is, we compare the

<sup>3</sup><https://eda.rg.cispa.io/prj/pepsi/>

| Method | Number of confounders |      |      |      |      |
|--------|-----------------------|------|------|------|------|
|        | 1                     | 2    | 3    | 4    | 5    |
| CDHC   | 0.43                  | 0.38 | 0.35 | 0.23 | 0.15 |
| DCD    | 0.35                  | 0.18 | 0.11 | 0.07 | 0.03 |
| 3OFF2  | 0.36                  | 0.2  | 0.14 | 0.11 | 0.04 |
| GFCI   | 0.22                  | 0.11 | 0.05 | 0.02 | 0.01 |

Table 1: Comparison of CDHC, DCD, 3OFF2 and GFCI for graphs with varying numbers of latent confounders. While all methods perform well, only CDHC maintains its performance as the number of latent factors increases.

confidence—the improvement of the discovered network compared to a baseline—of each method to a range of metrics measuring the quality of our results. We provide details on the computation of the confidences in Appendix A.3.

We evaluate each method based on four criteria: (1) the  $F_1$  score for network recovery including the confounder ( $F_1^{\text{net}}$ ), (2) the  $F_1$  score for the recovery of the set of confounded nodes ( $F_1^{\text{conf}}$ ), (3) the Structural Hamming Distance (SHD) between the discovered and true network, and (4) the Structural Intervention Distance (SID) to measure differences in causal interpretations [Peters and Bühlmann, 2013].

We show the results in the form of decision rate (DR) plots in Fig. 4. First, we sort the result of each method by their confidence. Then we plot the confidence against each metric. On the left of each plot, we include data sets where each method is most confident and increase this number of sets until all are included on the right. We see that CDHC outperforms its competitors by a large margin. Interestingly, the choice of  $\mathcal{A}$  has little influence on the performance of CDHC, and the gap between each  $\mathcal{A}$  with CDHC- $\mathcal{A}$  is comparable. We include further results for GGSL and GES in Appendix A.4.

*Higher-dimensional  $Z$*  We next consider the effect of including multiple confounders  $Z_i$  in our causal model, each influencing non-overlapping sets of 5 variables in a network of  $m = 50$  variables. We show the  $F_1^{\text{conf}}$  scores for one to five confounders in Table 1. We omit NOTEARS, GGSL, and

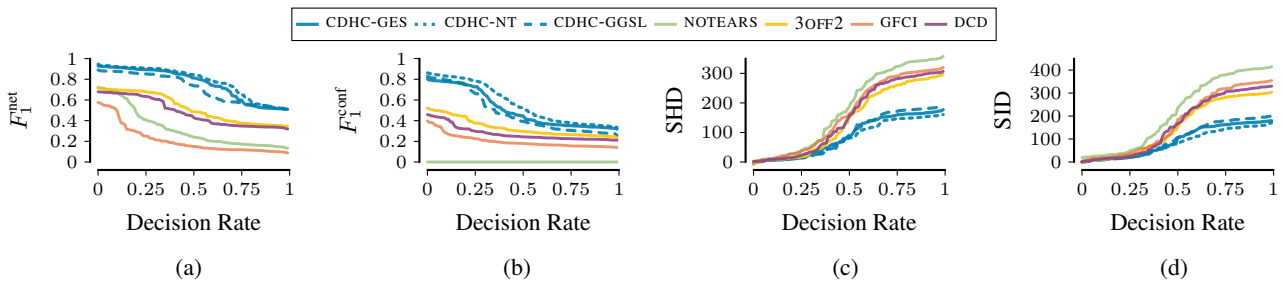

Figure 4: Evaluation on synthetic data.  $F_1$  scores for (a) network recovery and (b) confounded set recovery (higher is better), and (c) Structural Hamming Distance and (d) Structural Intervention Distance (lower is better). Each figure shows the average score over increasing fractions of all datasets, sorted in descending order by the confidence of each method.

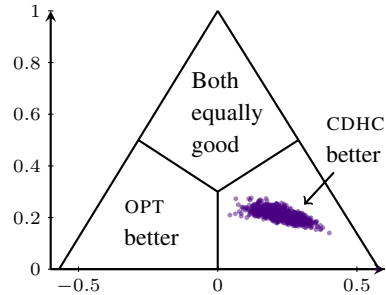

Figure 5: Significance assessment of the improvement of CDHC against its competitors.

GES since none of them are designed for this task.

We see that for one to three confounders, CDHC performs at a consistent level, but for four and five confounders, its performance decreases due to the difficulty of finding additional sets of confounded nodes. In contrast, while DCD, 3OFF2, and GFCI perform well for single-dimensional confounders, their performance drops immediately upon addition of a second latent confounder. The reason for this is instructive: since they do not model the confounder but instead indicate whether pairs of variables are confounded, they cannot distinguish between different confounders.

*Significance* To verify that CDHC significantly outperforms its competitors, we use the Bayesian signed rank test [Benavoli et al., 2014]. It explicitly models the probability that one model is significantly better than the other *in practice* by introducing a *region of practical equivalence* (rope) specified by parameter  $r$  [Benavoli et al., 2014]. Two methods are considered to perform equally well if the difference in scores for the methods lies in  $[-r, r]$ . We pick  $r = 0.05$  [Benavoli et al., 2014] but the conclusion remains the same for values  $r \in (0, 0.15]$ . Since the test was designed for *two* competing methods, for each dataset, we compare CDHC with the best-performing competitor, which we refer to as OPT. For each dataset  $k$ , we compute the  $F_1^{\text{net}}$  scores for both CDHC and OPT and compute their differences. We include more detail in Appendix A.5. We show the estimated pos-



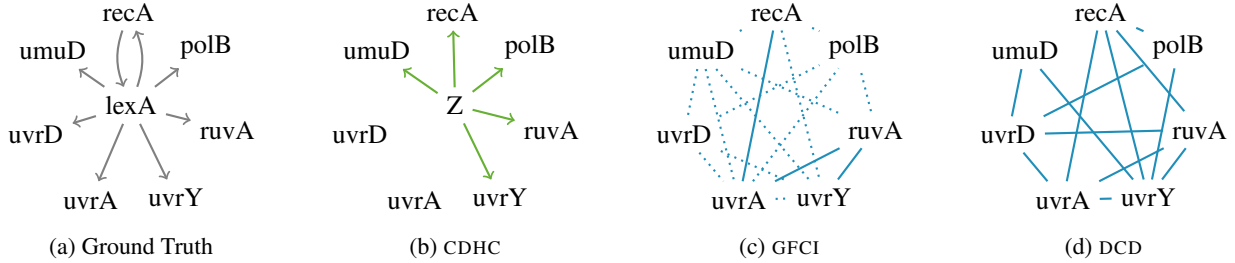

Figure 6: Results on SOS DNA repair network in *E. coli*. CDHC (b) discovers a confounder  $Z$  capturing five out of the seven edges (green) in the ground truth network (a). In contrast, GFCI (c) and DCD (d) find many pairs of nodes that are confounded (solid blue), and in the case of GFCI, more pairs yet which *might* be confounded (dotted). However, they do not discover that all nodes share the same confounder, making the resulting networks challenging to interpret.

terior distribution resulting from this comparison in Fig. 5. Here, the top region contains points where both methods are practically equally good, while the bottom left and right corners contain points where OPT, respectively CDHC, perform better. We see that all points lie squarely in the region, indicating CDHC to outperform OPT, suggesting that CDHC performs significantly better than its competitors.

## 5.2 CASE STUDY: CELLULAR SIGNALING

Finally, we consider real-world data to investigate the interpretability of the results returned by CDHC. In particular, we consider the SOS DNA repair network in *E. coli* [Ronen et al., 2002]. This data consists of protein levels of eight genes measured every five minutes for five hours, resulting in only 60 samples. Since the governing relationships in gene regulation are highly nonlinear, this tests the applicability of CDHC even when our assumptions do not hold.

Since the ground truth network has been established [Perin et al., 2003], we can test CDHC by excluding a gene known to have a downstream causal effect on other genes. An excellent candidate is *lexA* as it has a causal influence on *all* of the other genes: it is upstream of six genes and has a bidirectional relationship with the seventh (Fig. 6a). We also applied the other methods on the same data, including here the results of both GFCI and DCD, and postpone the networks discovered by the other methods to Appendix A.7.

We show the results in Fig. 6. For clarity, we focus only on discovering which confounded nodes. In Fig. 6b, we find a striking similarity between the  $Z$  discovered by CDHC and the true common parent *lexA*. CDHC correctly identifies five out of seven relationships: four out of six downstream effects, as well as one of the two edges between *recA* and *lexA*—which is the most a DAG can do, given that the two edges are mutually exclusive. Next, for GFCI (Fig. 6c) and DCD (Fig. 6d), we indicate definite confounding by solid edges and correlations which could be due to either confounding or causation by dotted edges. GFCI indicates definite confounding for only three out of 16 pairs, while

we cannot be certain for the other pairs. The resulting network of DCD indicates definite confounding for many pairs of variables. However, neither method can determine that all variables share the *same* latent confounder. The results of both GFCI and DCD are consistent with many different structures and provide no well-founded way of choosing one over the other. That is, since GFCI and DCD indicate only pairwise confounding without any way to evaluate whether nodes are jointly confounded, interpretation of the resulting networks is difficult. Overall, despite low sample size and violations of our model assumptions, CDHC finds a readily interpretable network close to the ground truth.

## 6 DISCUSSION AND CONCLUSION

We studied the problem of discovering a causal network over both  $X$  and its latent confounders  $Z$ . In particular, by exploiting the structure among confounded nodes  $X_S$  we proved identifiability in the sparse linear Gaussian model.

We derived a general approach for discovering sets of confounded nodes from the algorithmic model of causality by explicitly modeling latent variables. We showed that including latent variables is only beneficial when the observed  $X$  are indeed confounded. We used MDL to determine which sets of variables are confounded and showed that CDHC is consistent for recovering the set of confounded nodes when combined with a consistent causal discovery method.

Evaluation of CDHC on synthetic data showed that it outperformed the state of the art on all considered metrics. Furthermore, on real data it generated results close to the ground truth despite small sample size and large deviations from its model assumptions. We further obtained more readily interpretable results than our competitors.

For the future, we are interested in more general identifiability results as well as developing better algorithms which do not require multiple passes of a causal discovery algorithm.

## References

- Jeffrey Adams, Niels Hansen, and Kun Zhang. Identification of partially observed linear causal models: Graphical conditions for the non-gaussian and heterogeneous cases. *Advances in Neural Information Processing Systems*, 34: 22822–22833, 2021.
- S  verine Affeldt, Louis Verny, and Herv   Isambert. 3off2: A network reconstruction algorithm based on 2-point and 3-point information statistics. In *BMC bioinformatics*, volume 17, pages 149–165. BioMed Central, 2016.
- Joshua D Angrist and J  rn-Steffen Pischke. *Mostly harmless econometrics: An empiricist’s companion*. Princeton university press, 2009.
- A. Benavoli, F. Mangili, G. Corani, M. Zaffalon, and F. Ruggeri. A bayesian wilcoxon signed-rank test based on the dirichlet process. In *ICML*, pages 1026–1034. JMLR, 2014.
- Rohit Bhattacharya, Tushar Nagarajan, Daniel Malinsky, and Ilya Shpitser. Differentiable causal discovery under unmeasured confounding. In *International Conference on Artificial Intelligence and Statistics*, pages 2314–2322. PMLR, 2021.
- David Maxwell Chickering. Learning equivalence classes of Bayesian-network structures. *JMLR*, 2:445–498, 2002.
- Diego Colombo, Marloes H. Maathuis, Markus Kalisch, and Thomas S. Richardson. Learning high-dimensional directed acyclic graphs with latent and selection variables. *Annals Stat.*, 40(1):294–321, 2012.
- Gal Elidan, Noam Lotner, Nir Friedman, and Daphne Koller. Discovering hidden variables: A structure-based approach. *Advances in Neural Information Processing Systems*, 13, 2000.
- Tian Gao, Kshitij Fadnis, and Murray Campbell. Local-to-global bayesian network structure learning. In *International Conference on Machine Learning*, pages 1193–1202. PMLR, 2017.
- Peter D. Gr  nwald. *The Minimum Description Length Principle*. MIT Press, 2007.
- Patrik O. Hoyer, Shohei Shimizu, Antti J. Kerminen, and Markus Palviainen. Estimation of causal effects using linear non-Gaussian causal models with hidden variables. *Int. J. Approx. Reason.*, 49:362–378, 2008.
- Biwei Huang, Charles Jia Han Low, Feng Xie, Clark Glymour, and Kun Zhang. Latent hierarchical causal structure discovery with rank constraints. *arXiv preprint arXiv:2210.01798*, 2022.
- Guido W Imbens and Donald B Rubin. *Causal inference in statistics, social, and biomedical sciences*. Cambridge University Press, 2015.
- Dominik Janzing and Bernhard Sch  lkopf. Causal inference using the algorithmic markov condition. *IEEE TIT*, 56: 5168–5194, 2010.
- Dominik Janzing and Bernhard Sch  lkopf. Detecting confounding in multivariate linear models via spectral analysis. *Journal of Causal Inference*, 6(1), 2018.
- Nathan Kallus, Xiaojie Mao, and Madeleine Udell. Causal inference with noisy and missing covariates via matrix factorization. In *NIPS*, pages 6920–6931. 2018.
- David Kaltenpoth and Jilles Vreeken. We are not your real parents: Telling causal from confounded using mdl. In *Proceedings of the 2019 SIAM International Conference on Data Mining*, pages 199–207. SIAM, 2019.
- Hugo Kesteloot, Susana Sans, and Daan Kromhout. Dynamics of cardiovascular and all-cause mortality in western and eastern europe between 1970 and 2000. *European heart journal*, 27(1):107–113, 2006.
- Murat Kocaoglu, Amin Jaber, Karthikeyan Shanmugam, and Elias Bareinboim. Characterization and learning of causal graphs with latent variables from soft interventions. In *NIPS*, pages 14346–14356. 2019.
- Daphne Koller and Nir Friedman. *Probabilistic Graphical Models: Principles and Techniques*. MIT Press, 2009.
- Alp Kucukelbir, Dustin Tran, Rajesh Ranganath, Andrew Gelman, and David M. Blei. Automatic differentiation variational inference. *JMLR*, 18:430–474, 2017.
- Erich Kummerfeld and Joseph Ramsey. Causal clustering for 1-factor measurement models. In *Proceedings of the 22nd ACM SIGKDD international conference on knowledge discovery and data mining*, pages 1655–1664, 2016.
- Ming Li and Paul Vit  nyi. *An introduction to Kolmogorov complexity and its applications*. Springer Science & Business Media, 2009.
- Alexander Marx and Jilles Vreeken. Formally justifying mdl-based inference of cause and effect. *arXiv preprint arXiv:2105.01902*, 2021.
- Juan Miguel Ogarr  o, Peter Spirtes, and Joe Ramsey. A hybrid causal search algorithm for latent variable models. In *Proceedings of the Eighth International Conference on Probabilistic Graphical Models*, pages 368–379, 2016.
- Giambattista Parascandolo, Niki Kilbertus, Mateo Rojas-Carulla, and Bernhard Sch  lkopf. Learning independent causal mechanisms. In *International Conference on Machine Learning*, pages 4036–4044. PMLR, 2018.

- Judea Pearl. *Causality: Models, Reasoning and Inference*. Cambridge University Press, 2nd edition, 2009.
- Bruno-Edouard Perrin, Liva Ralaivola, Aurélien Mazurie, Samuele Bottani, Jacques Mallet, and Florence d’Alché-Buc. Gene networks inference using dynamic bayesian networks. *Bioinformatics*, 19:138–148, 2003.
- Jonas Peters and Peter Bühlmann. Identifiability of gaussian structural equation models with equal error variances. *arXiv:1205.2536*, 2012.
- Jonas Peters and Peter Bühlmann. Structural intervention distance (sid) for evaluating causal graphs. *arXiv preprint arXiv:1306.1043*, 2013. URL <https://arxiv.org/abs/1306.1043>.
- Rajesh Ranganath and Adler Perotte. Multiple causal inference with latent confounding. *CoRR*, abs/1805.08273, 2018. URL <http://arxiv.org/abs/1805.08273>.
- Michal Ronen, Revital Rosenberg, Boris I. Shraiman, and Uri Alon. Assigning numbers to the arrows: Parameterizing a gene regulation network by using accurate expression kinetics. *PNAS*, 99, 2002.
- Bernhard Schölkopf, Francesco Locatello, Stefan Bauer, Nan Rosemary Ke, Nal Kalchbrenner, Anirudh Goyal, and Yoshua Bengio. Toward causal representation learning. *Proceedings of the IEEE*, 109(5):612–634, 2021.
- Ricardo Silva, Richard Scheines, Clark Glymour, Peter Spirtes, and David Maxwell Chickering. Learning the structure of linear latent variable models. *Journal of Machine Learning Research*, 7(2), 2006.
- Peter Spirtes, Clark N Glymour, and Richard Scheines. *Causation, prediction, and search*. MIT press, 2000.
- Michael E. Tipping and Christopher M. Bishop. Probabilistic principal component analysis. *J. R. Statist. Soc. B*, 61: 611–622, 1999.
- Yixin Wang and David M. Blei. The blessings of multiple causes. *JASA*, 114:1574–1596, 2018.
- Feng Xie, Ruichu Cai, Biwei Huang, Clark Glymour, Zhifeng Hao, and Kun Zhang. Generalized independent noise condition for estimating latent variable causal graphs. *Advances in neural information processing systems*, 33:14891–14902, 2020.
- Jiji Zhang. On the completeness of orientation rules for causal discovery in the presence of latent confounders and selection bias. *Artif. Intell.*, 172:1873–1896, 2008.
- Xun Zheng, Bryon Aragam, Pradeep Ravikumar, and Eric P Xing. Dags with no tears: Continuous optimization for structure learning. *arXiv preprint arXiv:1803.01422*, 2018.
- Fangting Zhou, Kejun He, and Yang Ni. Causal discovery with heterogeneous observational data. In *Uncertainty in Artificial Intelligence*, pages 2383–2393. PMLR, 2022.
